# Supplementary material
Source: publisher figshare collection journal article supplement (https://future-science-group.figshare.com/ndownloader/files/14660732)

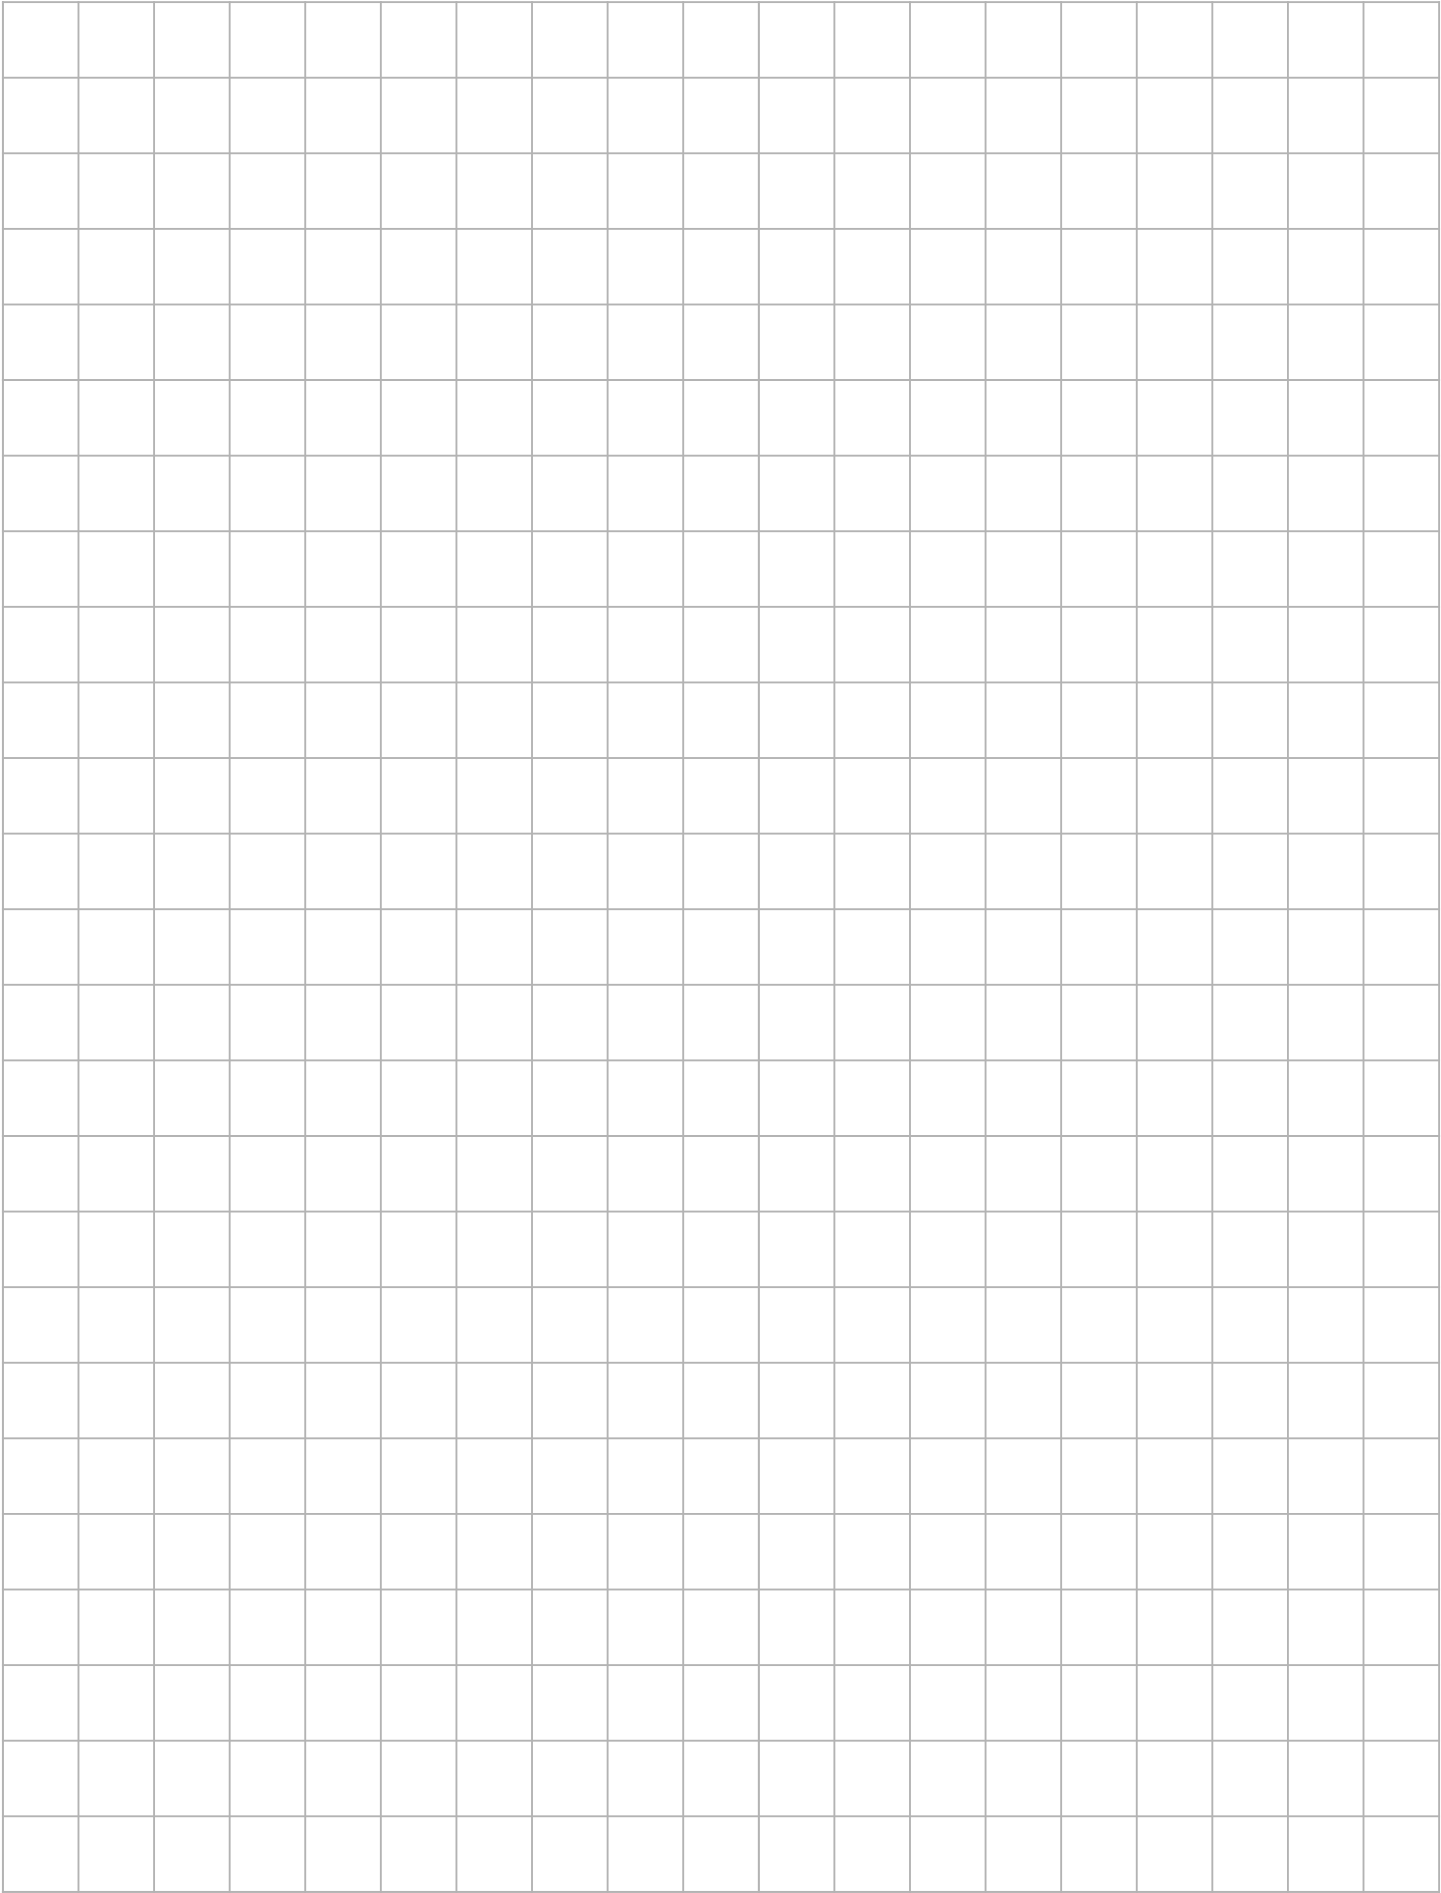

Supplement: Supplementary file 2 [file 14660732]
